# Supplementary material
Source: Springer Nature journal article supplement (https://www.springermedizin.de/resource/supplementary/12943_2013_1296_MOESM4_ESM.pdf/9553206)

## immature monocyte-derived dendritic cells (day 7)

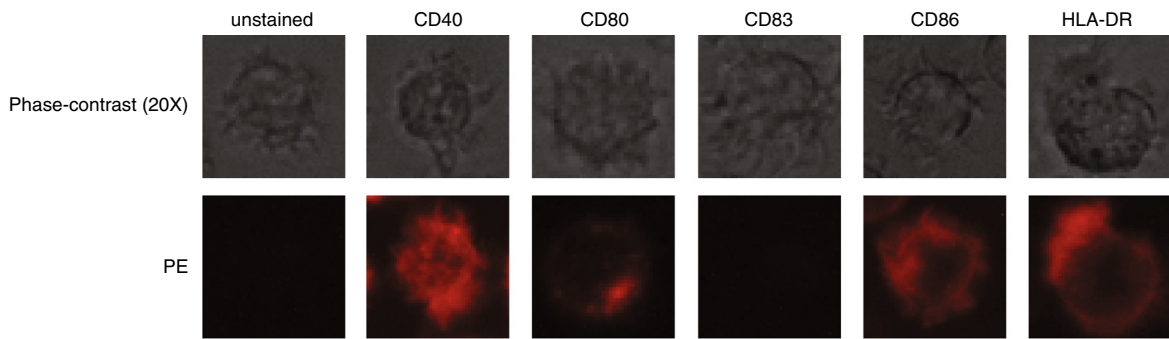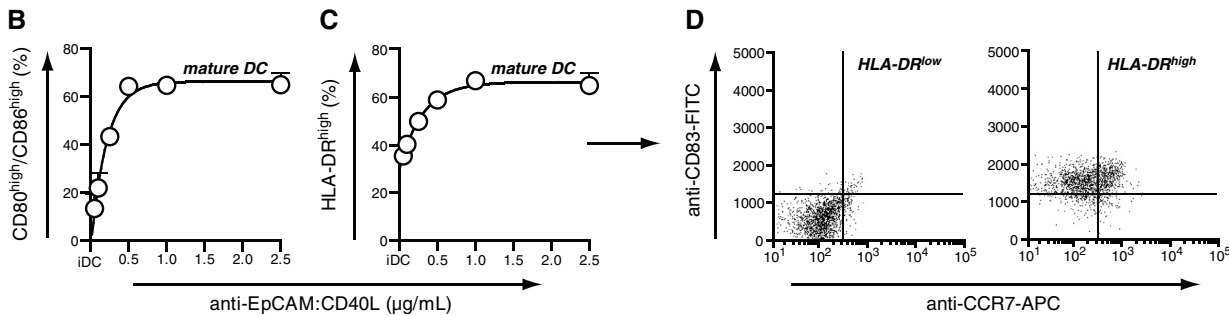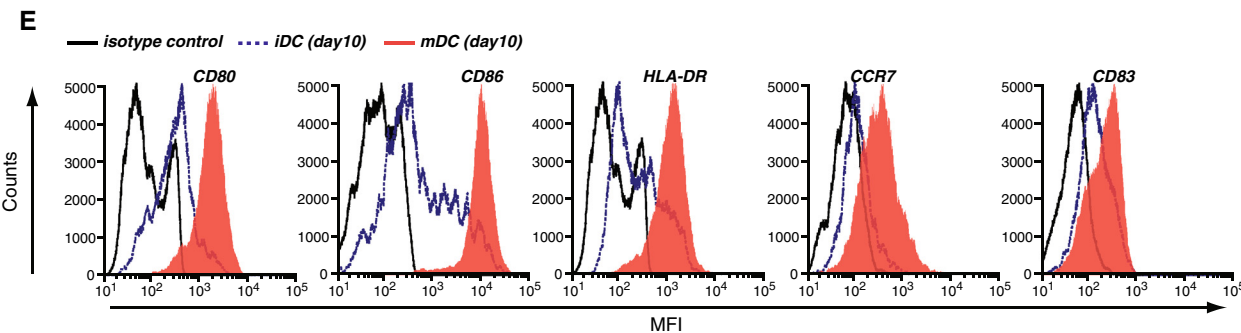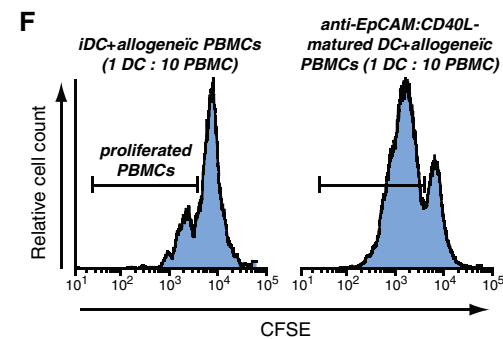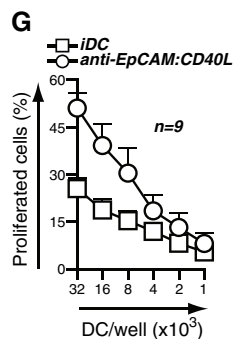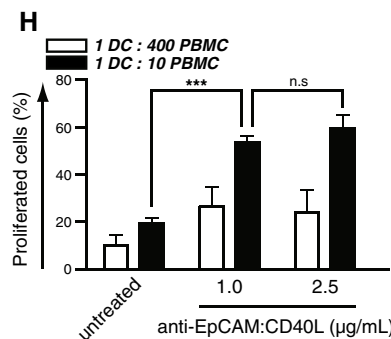

Supplement: MOESM4 [file 9553206]
